# Supplementary material
Source: PubMed Central journal article supplement (PMC1637089)

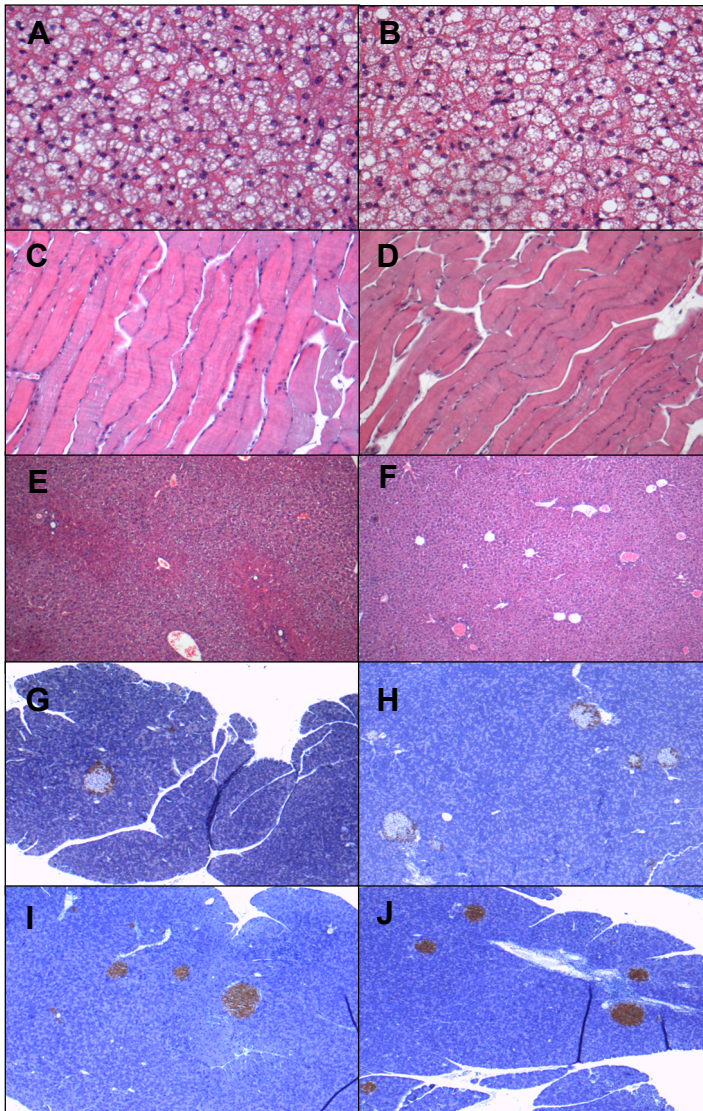

Supplement: pbio.0040369.sg002.pdf [file pbio.0040369.sg002.pdf]
